# Supplementary material
Source: ML conference proceedings conference paper supplement (https://proceedings.mlr.press/v108/wang20d.html)
Supplement: Supplementary file [file wang20d-supp.pdf]

## Appendix

**A** provides the detailed derivation of the updates for Algorithm 1.

**B** provides the proofs of theorems stated in Section 3.

**C** provides details on the simulated data in Section 4.

## A Derivation of the Nodewise Tensor Lasso Estimator

### A.1 Off-Diagonal updates

For  $1 \leq i_k < j_k \leq m_k$ ,  $T_{i_k j_k}(\Psi_k^{\text{off}})$  can be computed in closed form:

$$(T_{i_k j_k}(\Psi_k))_{i_k j_k}^{\text{off}} = \frac{S_{\lambda_k} \left( F_{\mathcal{X}, \{\Psi_k\}_{k=1}^K} \right)}{\left( \frac{1}{N} \mathcal{X}_{(k)} \mathcal{X}_{(k)}^T \right)_{i_k i_k} + \left( \frac{1}{N} \mathcal{X}_{(k)} \mathcal{X}_{(k)}^T \right)_{j_k j_k}}, \quad (9)$$

where

$$\begin{aligned} F_{\mathcal{X}, \{\Psi_k\}_{k=1}^K} = & -\frac{1}{N} \left( \left( (\mathcal{W}_{(k)} \circ \mathcal{X}_{(k)}) \mathcal{X}_{(k)}^T \right)_{i_k j_k} + \left( (\mathcal{W}_{(k)} \circ \mathcal{X}_{(k)}) \mathcal{X}_{(k)}^T \right)_{j_k i_k} \right. \\ & + \left( \mathcal{X}_{(k)} (\mathcal{X} \times_k \Psi_k^{\text{off}, i_k j_k})^T \right)_{j_k i_k} + \left( \mathcal{X}_{(k)} (\mathcal{X} \times_k \Psi_k^{\text{off}, i_k j_k})^T \right)_{i_k j_k} \\ & \left. + \sum_{l \neq k} \left( \mathcal{X}_{(k)} (\mathcal{X} \times_l \Psi_l^{\text{off}})^T \right)_{i_k j_k} + \sum_{l \neq k} \left( \mathcal{X}_{(k)} (\mathcal{X} \times_l \Psi_l^{\text{off}})^T \right)_{j_k i_k} \right). \end{aligned}$$

Here the  $\circ$  operator denotes the Hadamard product between matrices;  $\Psi_k^{\text{off}, i_k j_k}$  is  $\Psi_k^{\text{off}}$  with the  $(i_k, j_k)$  entry being zero; and  $S_\lambda(x) := \text{sign}(x)(|x| - \lambda)_+$  is the soft-thresholding operator.

### A.2 Diagonal updates

For  $\mathcal{W}$ ,

$$(T(\mathcal{W}))_{i_{[1:K]}} = \frac{-\left( \mathcal{X}_{(N)}^T \mathcal{Y}_{(N)} \right)_{i_{[1:K]}} + \sqrt{\left( \mathcal{X}_{(N)}^T \mathcal{Y}_{(N)} \right)_{i_{[1:K]}}^2 + 4 \left( \mathcal{X}_{(N)} \mathcal{X}_{(N)}^T \right)_{i_{[1:K]}}}}{2 \left( \mathcal{X}_{(N)} \mathcal{X}_{(N)}^T \right)_{i_{[1:K]}}}. \quad (10)$$

Here we define  $\mathcal{Y} := \sum_{k=1}^K (\mathcal{X} \times_k \Psi_k^{\text{off}})$ . Equations (9) and (10) give necessary ingredients for designing a coordinate descent approach to minimizing the objective function in (4). The optimization procedure is summarized in Algorithm 1.

### A.3 Derivation of updates

Note that for  $1 \leq i_k < j_k \leq m_k$ ,  $1 \leq k \leq K$ ,

$$\begin{aligned} & Q_N(\{\Psi_k\}_{k=1}^K) \\ & = (N/2) \left( \sum_{i_{[1:K-1], k+1:K}} (\mathcal{X}_{i_{[1:K]}}^{i_k}{}^2 + \mathcal{X}_{i_{[1:K]}}^{j_k}{}^2) \right) \left( (\Psi_k)_{i_k j_k} \right)^2 \\ & + N F_{\mathcal{X}, \{\Psi_k\}_{k=1}^K} (\Psi_k)_{i_k j_k} + \lambda_k |(\Psi_k)_{i_k j_k}| \\ & + \text{terms independent of } (\Psi_k)_{i_k j_k}, \end{aligned}$$

where

$$\begin{aligned}
 F_{\mathcal{X}, \{\Psi\}_{k=1}^K} = & - \sum_{i_{[1:k-1, k+1:K]}} \left( \mathcal{W}_{i_{[1:K]}}^{i_k} \mathcal{X}_{i_{[1:K]}}^{i_k} \mathcal{X}_{i_{[1:K]}}^{j_k} + \mathcal{W}_{i_{[1:K]}}^{j_k} \mathcal{X}_{i_{[1:K]}}^{j_k} \mathcal{X}_{i_{[1:K]}}^{i_k} \right. \\
 & + (\Psi_k)_{i_k, \setminus \{i_k, j_k\}}^T \mathcal{X}_{i_{[1:K]}}^{\setminus \{i_k, j_k\}} \mathcal{X}_{i_{[1:K]}}^{j_k} \\
 & + (\Psi_k)_{j_k, \setminus \{i_k, j_k\}}^T \mathcal{X}_{i_{[1:K]}}^{\setminus \{i_k, j_k\}} \mathcal{X}_{i_{[1:K]}}^{i_k} \\
 & + \sum_{l \in [1:k-1, k+1:K]} (\Psi_l)_{i_l, \setminus i_l}^T \mathcal{X}_{i_{[1:K]}}^{i_k, \setminus i_l} \mathcal{X}_{i_{[1:K]}}^{j_k} \\
 & \left. + \sum_{l \in [1:k-1, k+1:K]} (\Psi_l)_{i_l, \setminus i_l}^T \mathcal{X}_{i_{[1:K]}}^{j_k, \setminus i_l} \mathcal{X}_{i_{[1:K]}}^{i_k} \right).
 \end{aligned}$$

Here  $\mathcal{X}_{i_{[1:K]}}^{i_k}$  denotes the element of  $\mathcal{X}$  indexed by  $i_{[1:K]}$  except that the  $k$ th index is replaced by  $i_k$  and  $\mathcal{X}_{i_{[1:K]}}^{i_k, j_l}$  denotes the element of  $\mathcal{X}$  indexed by  $i_{[1:K]}$  except that the  $k, l$ th indices are replaced by  $i_k, j_l$ . Note the following equivalence:

$$\begin{aligned}
 \sum_{i_{[1:k-1, k+1:K]}} \mathcal{W}_{i_{[1:K]}}^{i_k} \mathcal{X}_{i_{[1:K]}}^{i_k} \mathcal{X}_{i_{[1:K]}}^{j_k} & = \left( (\mathcal{W}^{(k)} \circ \mathcal{X}^{(k)}) \mathcal{X}^{(k)T} \right)_{i_k j_k} \\
 \sum_{i_{[1:k-1, k+1:K]}} \mathcal{X}_{i_{[1:K]}}^{i_k} \mathcal{X}_{i_{[1:K]}}^{j_k} & = (\mathcal{X}^{(k)} \mathcal{X}^{(k)T})_{i_k j_k} \\
 \sum_{i_{[1:k-1, k+1:K]}} (\Psi_l)_{i_l, \cdot}^T \mathcal{X}_{i_{[1:K]}}^{i_k, \cdot} \mathcal{X}_{i_{[1:K]}}^{j_k} & = \left( \mathcal{X}^{(k)} (\mathcal{X} \times_l \Psi_l)_{(k)}^T \right)_{j_k i_k},
 \end{aligned}$$

where  $\mathcal{W}$  is a tensor of the same dimensions of  $\mathcal{X}$ , formed by tensorize values in  $\mathcal{W}$ , and in the case of  $N > 1$  the last mode of  $\mathcal{W}$  is the observation mode similarly to  $\mathcal{X}$  but with exact replicates. Using the tensor notation and standard sub-differential method, Equation (9) then follows.

For  $\mathcal{W}_{i_{[1:K]}}$ , using similar tensor operations,

$$\begin{aligned}
 \frac{\partial}{\partial \mathcal{W}_{i_{[1:K]}}} Q_N(\mathcal{W}, \{\Psi_k^{\text{off}}\}_{k=1}^K) & = 0 \\
 \iff -\frac{1}{\mathcal{W}_{i_{[1:K]}}} + \mathcal{W}_{i_{[1:K]}}^2 \mathcal{X}_{i_{[1:K]}}^2 + \mathcal{W}_{i_{[1:K]}} \left( \mathcal{X}_{i_{[1:K]}} \sum_{k=1}^K (\mathcal{X} \times_k \Psi_k^{\text{off}})_{i_{[1:K]}} \right) & = 0 \\
 \iff \mathcal{W}_{i_{[1:K]}}^2 \left( \mathcal{X}_{(N)}^T \mathcal{X}_{(N)} \right)_{i_{[1:K]}} + \mathcal{W}_{i_{[1:K]}} \left( \mathcal{X}_{(N)}^T \sum_{k=1}^K (\mathcal{X} \times_k \Psi_k^{\text{off}}) \right)_{i_{[1:K]}} - 1 & = 0
 \end{aligned}$$

which is a quadratic equation in  $\mathcal{W}_{i_{[1:K]}}$  and since  $\mathcal{W}_{i_{[1:K]}} > 0$ , so the positive root has been retained as the solution. Note that the estimation for one entry of  $\mathcal{W}$  is independent of the other entries. So during the estimation process we update all the entries at once by noting that  $\text{diag} \left( \mathcal{X}_{(N)}^T \mathcal{X}_{(N)} \right) = \left( \left( \mathcal{X}_{(N)}^T \mathcal{X}_{(N)} \right)_{i_{[1:K]}} \right)_{i_{[1:K]}}$ .

## B Proofs of Main Theorems

We first list some properties of the loss function.

**Lemma B.1.** The following is true for the loss function:

- (i) There exist constants  $0 < \Lambda_{\min}^L \leq \Lambda_{\max}^L < \infty$  such that for  $\mathcal{S}_k := \{(i_k, j_k) : 1 \leq i_k < j_k \leq m_k\}, k = 1, \dots, K$ ,

$$\Lambda_{\min}^L \leq \lambda_{\min}(\bar{L}_{\mathcal{S}_k, \mathcal{S}_k}''(\bar{\beta})) \leq \lambda_{\max}(\bar{L}_{\mathcal{S}_k, \mathcal{S}_k}''(\bar{\beta})) \leq \Lambda_{\max}^L$$

- (ii) There exists a constant  $K(\bar{\beta}) < \infty$  such that for all  $1 \leq i_k < j_k \leq m_k, \bar{L}_{i_k j_k, i_k j_k}''(\bar{\beta}) \leq K(\bar{\beta})$

- (iii) There exist constant  $M_1(\bar{\beta}), M_2(\bar{\beta}) < \infty$ , such that for any  $1 \leq i_k < j_k \leq m_k$

$$\text{Var}_{\mathcal{W}, \bar{\beta}}(L'_{i_k j_k}(\bar{\mathcal{W}}, \bar{\beta}, \mathcal{X})) \leq M_1(\bar{\beta}), \text{Var}_{\mathcal{W}, \bar{\beta}}(L''_{i_k j_k, i_k j_k}(\bar{\mathcal{W}}, \bar{\beta}, \mathcal{X})) \leq M_2(\bar{\beta})$$

(iv) There exists a constant  $0 < g(\bar{\beta}) < \infty$ , such that for all  $(i, j) \in \mathcal{A}_k$

$$\bar{L}''_{ij,ij}(\bar{\mathcal{W}}, \bar{\beta}) - \bar{L}''_{ij, \mathcal{A}_k^{ij}}(\bar{\mathcal{W}}, \bar{\beta}) [\bar{L}''_{\mathcal{A}_k^{ij}, \mathcal{A}_k^{ij}}(\bar{\mathcal{W}}, \bar{\beta})]^{-1} \bar{L}''_{\mathcal{A}_k^{ij}, ij}(\bar{\mathcal{W}}, \bar{\beta}) \geq g(\bar{\beta}),$$

where  $\mathcal{A}_k^{ij} := \mathcal{A}_k / \{(i, j)\}$ .

(v) There exists a constant  $M(\bar{\beta}) < \infty$ , such that for any  $(i, j) \in \mathcal{A}_k^c$

$$\|\bar{L}''_{ij, \mathcal{A}_k}(\bar{\mathcal{W}}, \bar{\beta}) [\bar{L}''_{\mathcal{A}_k, \mathcal{A}_k}(\bar{\mathcal{W}}, \bar{\beta})]^{-1}\|_2 \leq M(\bar{\beta}).$$

*proof of Lemma B.1.* We prove (i). (ii – v) are then direct consequences, and the proofs follow from the proofs of B1.1–B1.4 in Peng et al. (2009), with the modifications being that the indexing is now with respect to each  $k$  for  $1 \leq k \leq K$ .

Consider the loss function in matrix form as in (5). Then  $\bar{L}''_{\mathcal{S}_k, \mathcal{S}_k}(\bar{\beta})$  is equivalent to  $\frac{\partial^2}{\partial \Psi_k^{\text{off}} \partial \Psi_k^{\text{off}}} L(\mathcal{W}, \{\Psi_k^{\text{off}}\}_{k=1}^K)$ , which is

$$\begin{aligned} & \frac{\partial^2}{\partial \Psi_k^{\text{off}} \partial \Psi_k^{\text{off}}} \left( \text{tr}(\Psi_k^T \mathbf{S} \Psi_k) + \text{first order terms in } \Psi_k + \text{terms independent of } \Psi_k \right) \\ &= \frac{\partial^2}{\partial \Psi_k^{\text{off}} \partial \Psi_k^{\text{off}}} \left( \text{tr}((\Psi_k^{\text{off}} + \text{diag}(\Psi_k))^T \mathbf{S} (\Psi_k^{\text{off}} + \text{diag}(\Psi_k))) + \text{first order terms in } \Psi_k^{\text{off}} \right. \\ & \quad \left. + \text{terms independent of } \Psi_k^{\text{off}} \right) \\ &= \frac{\partial^2}{\partial \Psi_k^{\text{off}} \partial \Psi_k^{\text{off}}} \left( \text{tr}((\Psi_k^{\text{off}})^T \mathbf{S} \Psi_k^{\text{off}}) + \text{first order terms in } \Psi_k^{\text{off}} + \text{terms independent of } \Psi_k^{\text{off}} \right) \\ &= \mathbf{S} = \frac{1}{N} \text{vec}(\mathcal{X})^T \text{vec}(\mathcal{X}). \end{aligned}$$

Thus  $\bar{L}''_{\mathcal{S}_k, \mathcal{S}_k}(\beta) = E_{\mathcal{W}, \beta}(\mathbf{S})$ . Then for any non-zero  $\mathbf{a} \in \mathbb{R}^p$ , we have

$$\mathbf{a}^T \bar{L}''_{\mathcal{S}_k, \mathcal{S}_k}(\bar{\beta}) \mathbf{a} = \mathbf{a}^T \bar{\Sigma} \mathbf{a} \geq \|\mathbf{a}\|_2^2 \lambda_{\min}(\bar{\Sigma}).$$

Similarly,  $\mathbf{a}^T \bar{L}''_{\mathcal{S}_k, \mathcal{S}_k}(\bar{\beta}) \mathbf{a} \leq \|\mathbf{a}\|_2^2 \lambda_{\max}(\bar{\Sigma})$ . By (A2),  $\bar{\Sigma}$  has bounded eigenvalues, thus the lemma is proved.  $\square$

**Lemma B.2.** Suppose conditions (A1–A2) hold, then for any  $\eta > 0$ , there exist constant  $c_{0,\eta}, c_{1,\eta}, c_{2,\eta}, c_{3,\eta}$ , such that for any  $u \in \mathbb{R}^{q_k}$  the following events hold with probability at least  $1 - O(\exp(-\eta \log p))$  for sufficiently large  $N$ :

- (i)  $\|L'_{N, \mathcal{A}_k}(\bar{\mathcal{W}}, \bar{\beta}, \mathcal{X})\|_2 \leq c_{0,\eta} \sqrt{q_k \frac{\log p}{N}}$
- (ii)  $|u^T L'_{N, \mathcal{A}_k}(\bar{\mathcal{W}}, \bar{\beta}, \mathcal{X})| \leq c_{1,\eta} \|u\|_2 \sqrt{q_k \frac{\log p}{N}}$
- (iii)  $|u^T L''_{N, \mathcal{A}_k \mathcal{A}_k}(\bar{\mathcal{W}}, \bar{\beta}, \mathcal{X}) u - u^T \bar{L}''_{\mathcal{A}_k \mathcal{A}_k}(\bar{\beta}) u| \leq c_{2,\eta} \|u\|_2^2 q_k \sqrt{\frac{\log p}{N}}$
- (iv)  $|L''_{N, \mathcal{A}_k \mathcal{A}_k}(\bar{\mathcal{W}}, \bar{\beta}, \mathcal{X}) u - \bar{L}''_{\mathcal{A}_k \mathcal{A}_k}(\bar{\beta}) u| \leq c_{3,\eta} \|u\|_2^2 q_k \sqrt{\frac{\log p}{N}}$

*proof of Lemma B.2.* (i) By Cauchy-Schwartz inequality,

$$\|L'_{N, \mathcal{A}_k}(\bar{\mathcal{W}}, \bar{\beta}, \mathcal{X})\|_2 \leq \sqrt{q_k} \max_{i \in \mathcal{A}_k} |L'_{N, i}(\bar{\mathcal{W}}, \bar{\beta}, \mathcal{X})|.$$

Then note that

$$\begin{aligned} & L'_{N,i}(\mathbf{W}, \beta, \mathbf{X}) \\ &= \sum_{i_{[1:k-1], p, i_{[k+1:K]}}} (e_{i_{[1:k-1], p, i_{[k+1:K]}}}(\mathbf{W}, \beta) \mathbf{X}_{i_{[1:k-1], q, i_{[k+1:K]}}} + e_{i_{[1:k-1], q, i_{[k+1:K]}}}(\mathbf{W}, \beta) \mathbf{X}_{i_{[1:k-1], p, i_{[k+1:K]}}}), \end{aligned}$$

where  $e_{i_{[1:k-1], p, i_{[k+1:K]}}} \mathbf{X}_{i_{[1:k-1], q, i_{[k+1:K]}}}(\mathbf{W}, \beta)$  is defined by

$$w_{i_{[1:k-1], p, i_{[k+1:K]}}} \mathbf{X}_{i_{[1:k-1], p, i_{[k+1:K]}}} + \sum_{j_k \neq p} (\Psi_k)_{p, j_k} \mathbf{X}_{i_{[1:k-1], j_k, i_{[k+1:K]}}} + \sum_{l \neq k} \sum_{j_l \neq i_l} (\Psi_l)_{i_l, j_l} \mathbf{X}_{i_{[1:k-1], p, i_{[k+1:K]}}}.$$

Then evaluated at the true parameter values  $(\bar{\mathbf{W}}, \bar{\beta})$ , we have  $e_{i_{[1:k-1], p, i_{[k+1:K]}}}(\bar{\mathbf{W}}, \bar{\beta})$  uncorrelated with  $\mathbf{X}_{i_{[1:k-1], \setminus p, i_{[k+1:K]}}}$  and  $E_{(\bar{\mathbf{W}}, \bar{\beta})}(e_{i_{[1:k-1], p, i_{[k+1:K]}}}(\bar{\mathbf{W}}, \bar{\beta})) = 0$ . Also, since  $\mathbf{X}$  is subgaussian and  $\text{Var}(L'_{N,i}(\bar{\mathbf{W}}, \bar{\beta}, \mathbf{X}))$  is bounded by Lemma C.1.  $\forall i$ ,  $L'_{N,i}(\bar{\mathbf{W}}, \bar{\beta}, \mathbf{X})$  has subexponential tails. Thus, by Bernstein inequality,

$$\begin{aligned} & P(\|L'_{N, \mathcal{A}_k}(\bar{\mathbf{W}}, \bar{\beta}, \mathbf{X})\|_2 \leq c_{0, \eta} \sqrt{q_k \frac{\log p}{N}}) \\ & \geq P(\sqrt{q_k} \max_{i \in \mathcal{A}_k} |L'_{N,i}(\bar{\mathbf{W}}, \bar{\beta}, \mathbf{X})| \leq c_{0, \eta} \sqrt{q_k \frac{\log p}{N}}) \geq 1 - O(\exp(-\eta \log p)). \end{aligned}$$

(iii) By Cauchy-Schwartz,

$$\begin{aligned} & |u^T L''_{N, \mathcal{A}_k \mathcal{A}_k}(\bar{\mathbf{W}}, \bar{\beta}, \mathbf{X})u - u^T \bar{L}''_{\mathcal{A}_k \mathcal{A}_k}(\bar{\beta})u| \\ & \leq \|u\|_2 \|u^T L''_{N, \mathcal{A}_k \mathcal{A}_k}(\bar{\mathbf{W}}, \bar{\beta}, \mathbf{X}) - u^T \bar{L}''_{\mathcal{A}_k \mathcal{A}_k}(\bar{\beta})\|_2 \\ & \leq \|u\|_2 \sqrt{q_k} \max_i |u^T L''_{N, \mathcal{A}_k, i}(\bar{\mathbf{W}}, \bar{\beta}, \mathbf{X}) - u^T \bar{L}''_{\mathcal{A}_k, i}(\bar{\beta})| \\ & = \|u\|_2 \sqrt{q_k} |u^T L''_{N, \mathcal{A}_k, i_{\max}}(\bar{\mathbf{W}}, \bar{\beta}, \mathbf{X}) - u^T \bar{L}''_{\mathcal{A}_k, i_{\max}}(\bar{\beta})| \\ & = \|u\|_2 \sqrt{q_k} \left| \sum_{j=1}^{q_k} (u_j L''_{N, j, i_{\max}}(\bar{\mathbf{W}}, \bar{\beta}, \mathbf{X}) - u_j \bar{L}''_{j, i_{\max}}(\bar{\beta})) \right| \\ & \leq \|u\|_2 q_k |u_{j_{\max}}| |L''_{N, j_{\max}, i_{\max}}(\bar{\mathbf{W}}, \bar{\beta}, \mathbf{X}) - \bar{L}''_{j_{\max}, i_{\max}}(\bar{\beta})| \\ & \leq \|u\|_2^2 q_k |L''_{N, j_{\max}, i_{\max}}(\bar{\mathbf{W}}, \bar{\beta}, \mathbf{X}) - \bar{L}''_{j_{\max}, i_{\max}}(\bar{\beta})|. \end{aligned}$$

Then by Bernstein inequality,

$$\begin{aligned} & P(|u^T L''_{N, \mathcal{A}_k \mathcal{A}_k}(\bar{\mathbf{W}}, \bar{\beta}, \mathbf{X})u - u^T \bar{L}''_{\mathcal{A}_k \mathcal{A}_k}(\bar{\beta})u| \leq c_{2, \eta} \|u\|_2^2 q_k \sqrt{\frac{\log p}{N}}) \\ & \geq P(\|u\|_2^2 q_k |L''_{N, j_{\max}, i_{\max}}(\bar{\mathbf{W}}, \bar{\beta}, \mathbf{X}) - \bar{L}''_{j_{\max}, i_{\max}}(\bar{\beta})| \leq c_{2, \eta} \|u\|_2^2 q_k \sqrt{\frac{\log p}{N}}) \\ & \geq 1 - O(\exp(-\eta \log p)). \end{aligned}$$

(ii) and (iv) can be proved using similar arguments. □

Lemma C.3. and C.4. are used later to prove Theorem 1.

**Lemma B.3.** Assuming conditions of Theorem 1. Then there exists a constant  $C_1(\bar{\beta}) > 0$  such that for any  $\eta > 0$ , there exists a global minimizer of the restricted problem (8) within the disc:

$$\{\beta : \|\beta - \bar{\beta}\|_2 \leq C_1(\bar{\beta}) \sqrt{K} \max_k \sqrt{q_k} \lambda_{N, k}\}$$

with probability at least  $1 - O(\exp(-\eta \log p))$  for sufficiently large  $N$ .

*proof of Lemma B.3.* Let  $\alpha_N = \max_k \sqrt{q_k} \lambda_{N,k}$ . Further for  $1 \leq k \leq K$  let  $C_k > 0$  and  $u^k \in \mathbb{R}^{m_k(m_k-1)/2}$  such that  $u_{\mathcal{A}_k^c}^k = 0$ ,  $\|u^k\|_2 = C_k$ , and  $u = (u_1, \dots, u_K)$  with  $\sqrt{K} \min_k C_k \leq \|u\|_2 \leq \sqrt{K} \max_k C_k$ .

Then by Cauchy-Schwartz and triangle inequality, we have

$$\|\bar{\beta}^k + \alpha_N u^k - \alpha_N u^k\|_1 \leq \|\bar{\beta}^k + \alpha_N u^k\|_1 + \alpha_N \|u^k\|_1,$$

and

$$\|\bar{\beta}^k\|_1 - \|\bar{\beta}^k + \alpha_N u^k\|_1 \leq \alpha_N \|u^k\|_1 \leq \alpha_N \sqrt{q_k} \|u^k\|_2 = C_k \alpha_N \sqrt{q_k}.$$

Thus,

$$\begin{aligned} & Q_N(\bar{\beta} + \alpha_N u, \mathcal{X}, \{\lambda_{N,k}\}_{k=1}^K) - Q_N(\bar{\beta}, \mathcal{X}, \{\lambda_{N,k}\}_{k=1}^K) \\ &= L_N(\bar{\beta} + \alpha_N u, \mathcal{X}) - L_N(\bar{\beta}, \mathcal{X}) - \sum_{k=1}^K \lambda_{N,k} (\|\bar{\beta}^k\|_1 - \|\bar{\beta}^k + \alpha_N u^k\|_1) \\ &\geq L_N(\bar{\beta} + \alpha_N u, \mathcal{X}) - L_N(\bar{\beta}, \mathcal{X}) - \sum_{k=1}^K \lambda_{N,k} C_k \alpha_N \sqrt{q_k} \\ &\geq L_N(\bar{\beta} + \alpha_N u, \mathcal{X}) - L_N(\bar{\beta}, \mathcal{X}) - \alpha_N K \max_k C_k \sqrt{q_k} \lambda_{N,k} \\ &\geq L_N(\bar{\beta} + \alpha_N u, \mathcal{X}) - L_N(\bar{\beta}, \mathcal{X}) - K \alpha_N^2 \max_k C_k. \end{aligned}$$

Next,

$$\begin{aligned} & L_N(\bar{\beta} + \alpha_N u, \mathcal{X}) - L_N(\bar{\beta}, \mathcal{X}) = \alpha_N u_{\mathcal{A}}^T L'_{N,\mathcal{A}}(\bar{\beta}, \mathcal{X}) + \frac{1}{2} \alpha_N^2 u_{\mathcal{A}}^T L''_{N,\mathcal{A}\mathcal{A}}(\bar{\beta}, \mathcal{X}) u_{\mathcal{A}} \\ &= \alpha_N \sum_{k=1}^K (u_{\mathcal{A}_k}^k)^T L'_{N,\mathcal{A}_k}(\bar{\beta}, \mathcal{X}) + \frac{1}{2} \alpha_N^2 \sum_{k=1}^K (u_{\mathcal{A}_k}^k)^T L''_{N,\mathcal{A}_k\mathcal{A}_k}(\bar{\beta}, \mathcal{X}) u_{\mathcal{A}_k}^k \\ &= \alpha_N \sum_{k=1}^K (u_{\mathcal{A}_k}^k)^T L'_{N,\mathcal{A}_k}(\bar{\beta}, \mathcal{X}) + \frac{1}{2} \alpha_N^2 \sum_{k=1}^K (u_{\mathcal{A}_k}^k)^T (L''_{N,\mathcal{A}_k\mathcal{A}_k}(\bar{\beta}, \mathcal{X}) - \bar{L}''_{N,\mathcal{A}_k\mathcal{A}_k}(\bar{\beta}, \mathcal{X})) u_{\mathcal{A}_k}^k \\ &\quad + \frac{1}{2} \alpha_N^2 \sum_{k=1}^K (u_{\mathcal{A}_k}^k)^T \bar{L}''_{N,\mathcal{A}_k\mathcal{A}_k}(\bar{\beta}, \mathcal{X}) u_{\mathcal{A}_k}^k \\ &\geq \frac{1}{2} \alpha_N^2 \sum_{k=1}^K (u_{\mathcal{A}_k}^k)^T \bar{L}''_{N,\mathcal{A}_k\mathcal{A}_k}(\bar{\beta}, \mathcal{X}) u_{\mathcal{A}_k}^k - \alpha_N K (\max_k c_{1,\eta} \|u_{\mathcal{A}_k}^k\|_2 \sqrt{q_k \frac{\log p}{N}}) \\ &\quad - \frac{1}{2} \alpha_N^2 K (\max_k c_{2,\eta} \|u_{\mathcal{A}_k}^k\|_2^2 q_k \sqrt{\frac{\log p}{N}}). \end{aligned}$$

Here the first equality is due to the second order expansion of the loss function and the inequality is due to Lemma B.2. For sufficiently large  $N$ , by assumption that  $\lambda_{N,k} \sqrt{N/\log p} \rightarrow \infty$  if  $m_k \rightarrow \infty$  and  $\sqrt{\log p/N} = o(1)$ , the second term in the last line above is  $o(\alpha_N \sqrt{q_k} \lambda_{N,k}) = o(\alpha_N^2)$ ; the last term is  $o(\alpha_N^2)$ . Therefore, for sufficiently large  $N$

$$\begin{aligned} & Q_N(\bar{\beta} + \alpha_N u, \mathcal{X}, \{\lambda_{N,k}\}_{k=1}^K) - Q_N(\bar{\beta}, \mathcal{X}, \{\lambda_{N,k}\}_{k=1}^K) \geq \frac{1}{2} \alpha_N^2 \sum_{k=1}^K (u_{\mathcal{A}_k}^k)^T \bar{L}''_{N,\mathcal{A}_k\mathcal{A}_k}(\bar{\beta}, \mathcal{X}) u_{\mathcal{A}_k}^k \\ &\quad - K \alpha_N^2 \max_k C_k \\ &\geq \frac{1}{2} \alpha_N^2 K \min_k ((u_{\mathcal{A}_k}^k)^T \bar{L}''_{N,\mathcal{A}_k\mathcal{A}_k}(\bar{\beta}, \mathcal{X}) u_{\mathcal{A}_k}^k) \\ &\quad - K \alpha_N^2 \max_k C_k, \end{aligned}$$

with probability at least  $1 - O(N^{-\eta})$ . By Lemma B.1., for each  $k$ ,  $(u_{\mathcal{A}_k}^k)^T \bar{L}''_{N,\mathcal{A}_k\mathcal{A}_k}(\bar{\beta}, \mathcal{X}) u_{\mathcal{A}_k}^k \geq \Lambda_{\min}^L \|u_{\mathcal{A}_k}^k\|_2^2 = \Lambda_{\min}^L (C_k)^2$ . So, if we choose  $\min_k C_k$  and  $\max_k C_k$  such that the upper bound is minimized, then for  $N$  sufficiently

large, the following holds

$$\inf_{u: u_{(\mathcal{A}_k)^c} = 0, \|u^k\|_2 = C_k, k=1, \dots, K} Q_N(\bar{\beta} + \alpha_N u, \mathcal{X}, \{\lambda_{N,k}\}_{k=1}^K) > Q_N(\bar{\beta}, \mathcal{X}, \{\lambda_{N,k}\}_{k=1}^K),$$

with probability at least  $1 - O(\exp(-\eta \log p))$ , which means any solution to the problem defined in (8) is within the disc  $\{\beta : \|\beta - \bar{\beta}\|_2 \leq \alpha_N \|u\|_2 \leq \alpha_N \sqrt{K} \max_k C_k\}$  with probability at least  $1 - O(\exp(-\eta \log p))$ .  $\square$

**Lemma B.4.** Assuming conditions of Theorems 1. Then there exists a constant  $C_2(\bar{\beta}) > 0$ , such that for any  $\eta > 0$ , for sufficiently large  $N$ , the following event holds with probability at least  $1 - O(\exp(-\eta \log p))$ : if for any  $\beta \in S = \{\beta : \|\beta - \bar{\beta}\|_2 \geq C_2(\bar{\beta}) \sqrt{K} \max_k \sqrt{q_k} \lambda_{N,k}, \beta_{\mathcal{A}_N^c} = 0\}$ , then  $\|L'_{N, \mathcal{A}_N}(\bar{\mathcal{W}}, \bar{\beta}, \mathcal{X})\|_2 > \sqrt{K} \max_k \sqrt{q_k} \lambda_{N,k}$ .

*proof of Lemma B.4.* Let  $\alpha_N = \max_k \sqrt{q_k} \lambda_{N,k}$ . For  $\beta \in S$ , we have  $\beta = \bar{\beta} + \alpha_N u$ , with  $u_{(\mathcal{A})^c} = 0$  and  $\|u\|_2 \geq C_2(\bar{\beta})$ . Note that by Taylor expansion of  $L'_{N, \mathcal{A}}(\bar{\mathcal{W}}, \beta, \mathcal{X})$  at  $\bar{\beta}$

$$\begin{aligned} L'_{N, \mathcal{A}}(\bar{\mathcal{W}}, \beta, \mathcal{X}) &= L'_{N, \mathcal{A}}(\bar{\mathcal{W}}, \bar{\beta}, \mathcal{X}) + \alpha_N L''_{N, \mathcal{A}}(\bar{\mathcal{W}}, \bar{\beta}, \mathcal{X}) u_{\mathcal{A}} \\ &= L'_{N, \mathcal{A}}(\bar{\mathcal{W}}, \bar{\beta}, \mathcal{X}) + \alpha_N (L''_{N, \mathcal{A}}(\bar{\mathcal{W}}, \bar{\beta}, \mathcal{X}) - \bar{L}''_{N, \mathcal{A}}(\bar{\beta})) u_{\mathcal{A}} \\ &\quad + \alpha_N \bar{L}''_{N, \mathcal{A}}(\bar{\beta}) u_{\mathcal{A}}. \end{aligned}$$

By triangle inequality and similar proof strategies as in Lemma B.3., for sufficiently large  $N$

$$\begin{aligned} \|L'_{N, \mathcal{A}}(\bar{\mathcal{W}}, \beta, \mathcal{X})\|_2 &\geq \|L'_{N, \mathcal{A}}(\bar{\mathcal{W}}, \bar{\beta}, \mathcal{X})\|_2 + \alpha_N \|L''_{N, \mathcal{A}}(\bar{\mathcal{W}}, \bar{\beta}, \mathcal{X}) u_{\mathcal{A}} - \bar{L}''_{N, \mathcal{A}}(\bar{\beta}) u_{\mathcal{A}}\|_2 \\ &\quad + \alpha_N \|\bar{L}''_{N, \mathcal{A}}(\bar{\beta}) u_{\mathcal{A}}\|_2 \\ &\geq \alpha_N \|\bar{L}''_{N, \mathcal{A}}(\bar{\beta}) u_{\mathcal{A}}\|_2 + o(\alpha_N) \end{aligned}$$

with probability at least  $1 - O(\exp(-\eta \log p))$ . By Lemma B.1.,  $\|\bar{L}''_{N, \mathcal{A}}(\bar{\beta}) u_{\mathcal{A}}\|_2 \geq \Lambda_{\min}^L(\bar{\beta}) \|u_{\mathcal{A}}\|_2$ . Therefore, taking  $C_2(\bar{\beta})$  to be  $1/\Lambda_{\min}^L(\bar{\beta}) + \epsilon$  completes the proof.  $\square$

*proof of Theorem 1.* By the Karush-Kuhn-Tucker condition, for any solution  $\hat{\beta}$  of (8), it satisfies  $\|L'_{N, \mathcal{A}_k}(\bar{\mathcal{W}}, \hat{\beta}, \mathcal{X})\|_{\infty} \leq \lambda_{N,k}$ . Thus,

$$\begin{aligned} \|L'_{N, \mathcal{A}_N}(\bar{\mathcal{W}}, \hat{\beta}, \mathcal{X})\|_2 &\leq \sqrt{K} \max_k \|L'_{N, \mathcal{A}_k}(\bar{\mathcal{W}}, \hat{\beta}, \mathcal{X})\|_2 \\ &\leq \sqrt{K} \max_k \sqrt{q_k} \|L'_{N, \mathcal{A}_k}(\bar{\mathcal{W}}, \hat{\beta}, \mathcal{X})\|_{\infty} \\ &\leq \sqrt{K} \max_k \sqrt{q_k} \lambda_{N,k}. \end{aligned}$$

Then by Lemmas B.4., for any  $\eta > 0$ , for  $N$  sufficiently large, all solutions of (8) are inside the disc  $\{\beta : \|\beta - \bar{\beta}\|_2 \leq C_2(\bar{\beta}) \max_k \sqrt{q_k} \lambda_{N,k}, \beta_{\mathcal{A}_N^c} = 0\}$  with probability at least  $1 - O(\exp(-\eta \log p))$ . If we further assume that  $\min_{(i,j) \in \mathcal{A}_k} |\bar{\beta}_{i,j}| \geq 2C(\bar{\beta}) \max_k \sqrt{q_k} \lambda_{N,k}$  for each  $k$ , then

$$\begin{aligned} &1 - O(\exp(-\eta \log p)) \\ &\leq P_{\bar{\mathcal{W}}, \bar{\beta}}(\|\hat{\beta}^{\mathcal{A}} - \bar{\beta}^{\mathcal{A}}\|_2 \leq C_2(\bar{\beta}) \max_k \sqrt{q_k} \lambda_{N,k}, \min_{(i,j) \in \mathcal{A}_k} |\bar{\beta}_{i,j}| \geq 2C(\bar{\beta}) \max_k \sqrt{q_k} \lambda_{N,k}, \forall k) \\ &\leq P_{\bar{\mathcal{W}}, \bar{\beta}}(\text{sign}(\hat{\beta}_{i_k j_k}^{\mathcal{A}_k}) = \text{sign}(\bar{\beta}_{i_k j_k}^{\mathcal{A}_k}), \forall (i_k, j_k) \in \mathcal{A}_k, \forall k). \end{aligned}$$

$\square$

*proof of Theorem 2.* Let  $\mathcal{E}_{N,k} = \{\text{sign}(\hat{\beta}_{i_k j_k}^{\mathcal{A}_k}) = \text{sign}(\bar{\beta}_{i_k j_k}^{\mathcal{A}_k})\}$ . Then by Theorem 1,  $P_{\bar{\mathcal{W}}, \bar{\beta}}(\mathcal{E}_{N,k}) \geq 1 - O(\exp(-\eta \log p))$  for large  $N$ . On  $\mathcal{E}_{N,k}$ , By the KKT condition and the expansion of  $L'_{N, \mathcal{A}_k}(\bar{\mathcal{W}}, \hat{\beta}^{\mathcal{A}_k}, \mathcal{X})$  at  $\bar{\beta}^{\mathcal{A}_k}$

$$\begin{aligned} &-\lambda_{N,k} \text{sign}(\bar{\beta}^{\mathcal{A}_k}) \\ &= L'_{N, \mathcal{A}_k}(\bar{\mathcal{W}}, \hat{\beta}^{\mathcal{A}_k}, \mathcal{X}) \\ &= L'_{N, \mathcal{A}_k}(\bar{\mathcal{W}}, \bar{\beta}^{\mathcal{A}_k}, \mathcal{X}) + L''_{N, \mathcal{A}_k}(\bar{\mathcal{W}}, \bar{\beta}^{\mathcal{A}_k}, \mathcal{X}) v_{N,k} \\ &= \bar{L}''_{\mathcal{A}_k \mathcal{A}_k} v_{N,k} + L'_{N, \mathcal{A}_k}(\bar{\mathcal{W}}, \bar{\beta}^{\mathcal{A}_k}, \mathcal{X}) + (L''_{N, \mathcal{A}_k \mathcal{A}_k}(\bar{\mathcal{W}}, \bar{\beta}^{\mathcal{A}_k}, \mathcal{X}) - \bar{L}''_{\mathcal{A}_k \mathcal{A}_k}) v_{N,k}, \end{aligned}$$

where  $v_{N,k} = \hat{\beta}^{A_k} - \bar{\beta}^{A_k}$ . By rearranging the terms

$$v_{N,k} = -\lambda_{N,k} [\bar{L}''_{\mathcal{A}_k \mathcal{A}_k}]^{-1} \text{sign}(\bar{\beta}^{A_k}) - [\bar{L}''_{\mathcal{A}_k \mathcal{A}_k}]^{-1} [L'_{N, \mathcal{A}_k}(\bar{\mathcal{W}}, \bar{\beta}^{A_k}, \mathcal{X}) + D_{N, \mathcal{A}_k \mathcal{A}_k}(\bar{\mathcal{W}}, \bar{\beta}^{A_k})] v_{N,k}, \quad (11)$$

where  $D_{N, \mathcal{A}_k \mathcal{A}_k} = L''_{N, \mathcal{A}_k \mathcal{A}_k}(\bar{\mathcal{W}}, \bar{\beta}, \mathcal{X}) - \bar{L}''_{\mathcal{A}_k \mathcal{A}_k}$ . Next, for fixed  $(i, j) \in \mathcal{A}_k^c$ , by expanding  $L'_{N, \mathcal{A}_k}(\bar{\mathcal{W}}, \hat{\beta}^{A_k}, \mathcal{X})$  at  $\bar{\beta}^{A_k}$

$$L'_{N, ij}(\bar{\mathcal{W}}, \hat{\beta}^{A_k}, \mathcal{X}) = L'_{N, ij}(\bar{\mathcal{W}}, \bar{\beta}^{A_k}, \mathcal{X}) + L''_{N, ij, \mathcal{A}_k}(\bar{\mathcal{W}}, \bar{\beta}^{A_k}, \mathcal{X}) v_{N,k}. \quad (12)$$

Then combining (11) and (12) we get

$$\begin{aligned} & L'_{N, ij}(\bar{\mathcal{W}}, \hat{\beta}^{A_k}, \mathcal{X}) \\ &= -\lambda_{N,k} \bar{L}''_{ij, \mathcal{A}_k}(\bar{\beta}^{A_k}) [\bar{L}''_{\mathcal{A}_k \mathcal{A}_k}]^{-1} \text{sign}(\bar{\beta}^{A_k}) - \bar{L}''_{ij, \mathcal{A}_k}(\bar{\beta}^{A_k}) [\bar{L}''_{\mathcal{A}_k \mathcal{A}_k}]^{-1} L'_{N, \mathcal{A}_k}(\bar{\mathcal{W}}, \bar{\beta}^{A_k}, \mathcal{X}) \\ &+ [D_{N, ij, \mathcal{A}_k}(\bar{\mathcal{W}}, \bar{\beta}^{A_k}) - \bar{L}''_{ij, \mathcal{A}_k}(\bar{\beta}^{A_k}) [\bar{L}''_{\mathcal{A}_k \mathcal{A}_k}]^{-1} D_{N, \mathcal{A}_k \mathcal{A}_k}(\bar{\mathcal{W}}, \bar{\beta}^{A_k})] v_{N,k} \\ &+ L'_{N, ij}(\bar{\mathcal{W}}, \bar{\beta}^{A_k}, \mathcal{X}). \end{aligned} \quad (13)$$

By the incoherence condition outlined in condition (A3), for any  $(i, j) \in \mathcal{A}_k$ ,

$$|\bar{L}''_{ij, \mathcal{A}_k}(\bar{\mathcal{W}}, \bar{\beta}) [\bar{L}''_{\mathcal{A}_k \mathcal{A}_k}(\bar{\mathcal{W}}, \bar{\beta})]^{-1} \text{sign}(\bar{\beta}_{\mathcal{A}_k})| \leq \delta < 1.$$

Thus, following straightforwardly (with the modification that we are considering each  $\mathcal{A}_k$  instead of  $\mathcal{A}$ ) from the proofs of Theorem 2 of Peng et al. (2009), the remaining terms in (13) can be shown to be all  $o(\lambda_{N,k})$ , and the event  $\max_{(i,j) \in \mathcal{A}_k^c} |L'_{N, ij}(\bar{\mathcal{W}}, \hat{\beta}^{A_k}, \mathcal{X})| < \lambda_{N,k}$  with probability at least  $1 - O(\exp(-\eta \log p))$  for sufficiently large  $N$ . Thus, it has been proved that for sufficiently large  $N$ , no wrong edge will be included for each true edge set  $\mathcal{A}_k$  and hence, no wrong edge will be included in  $\mathcal{A} = \cup_k \mathcal{A}_k$ .  $\square$

*proof of Theorem 3.* By Theorem 1 and Theorem 2, with probability tending to 1, any solution of the restricted problem is also a solution of the original problem. On the other hand, by Theorem 2 and the KKT condition, with probability tending to 1, any solution of the original problem is also a solution of the restricted problem. Therefore, Theorem 3 follows.  $\square$

## C Simulated Precision Matrix

1. **AR1**( $\rho$ ): The covariance matrix of the form  $\mathbf{A} = (\rho^{|i-j|})_{ij}$  for  $\rho \in (0, 1)$ .
2. **Star-Block (SB)**: A block-diagonal covariance matrix, where each block's precision matrix corresponds to a star-structured graph with  $(\Psi_k)_{ij} = 1$ . Then, for  $\rho \in (0, 1)$ , we have that  $\mathbf{A}_{ij} = \rho$  if  $(i, j) \in E$  and  $\mathbf{A}_{ij} = \rho^2$  for  $(i, j) \notin E$ , where  $E$  is the corresponding edge set.
3. **Erdos-Renyi random graph (ER)**: The precision matrix is initialized at  $\mathbf{A} = 0.25\mathbf{I}$ , and  $d$  edges are randomly selected. For the selected edge  $(i, j)$ , we randomly choose  $\psi \in [0.6, 0.8]$  and update  $\mathbf{A}_{ij} = \mathbf{A}_{ji} \rightarrow \mathbf{A}_{ij} - \psi$  and  $\mathbf{A}_{ii} \rightarrow \mathbf{A}_{ii} + \psi$ ,  $\mathbf{A}_{jj} \rightarrow \mathbf{A}_{jj} + \psi$ .
